February 2011

# PSYCHIATRIC SERVICES

A Journal of the  
American Psychiatric  
Association

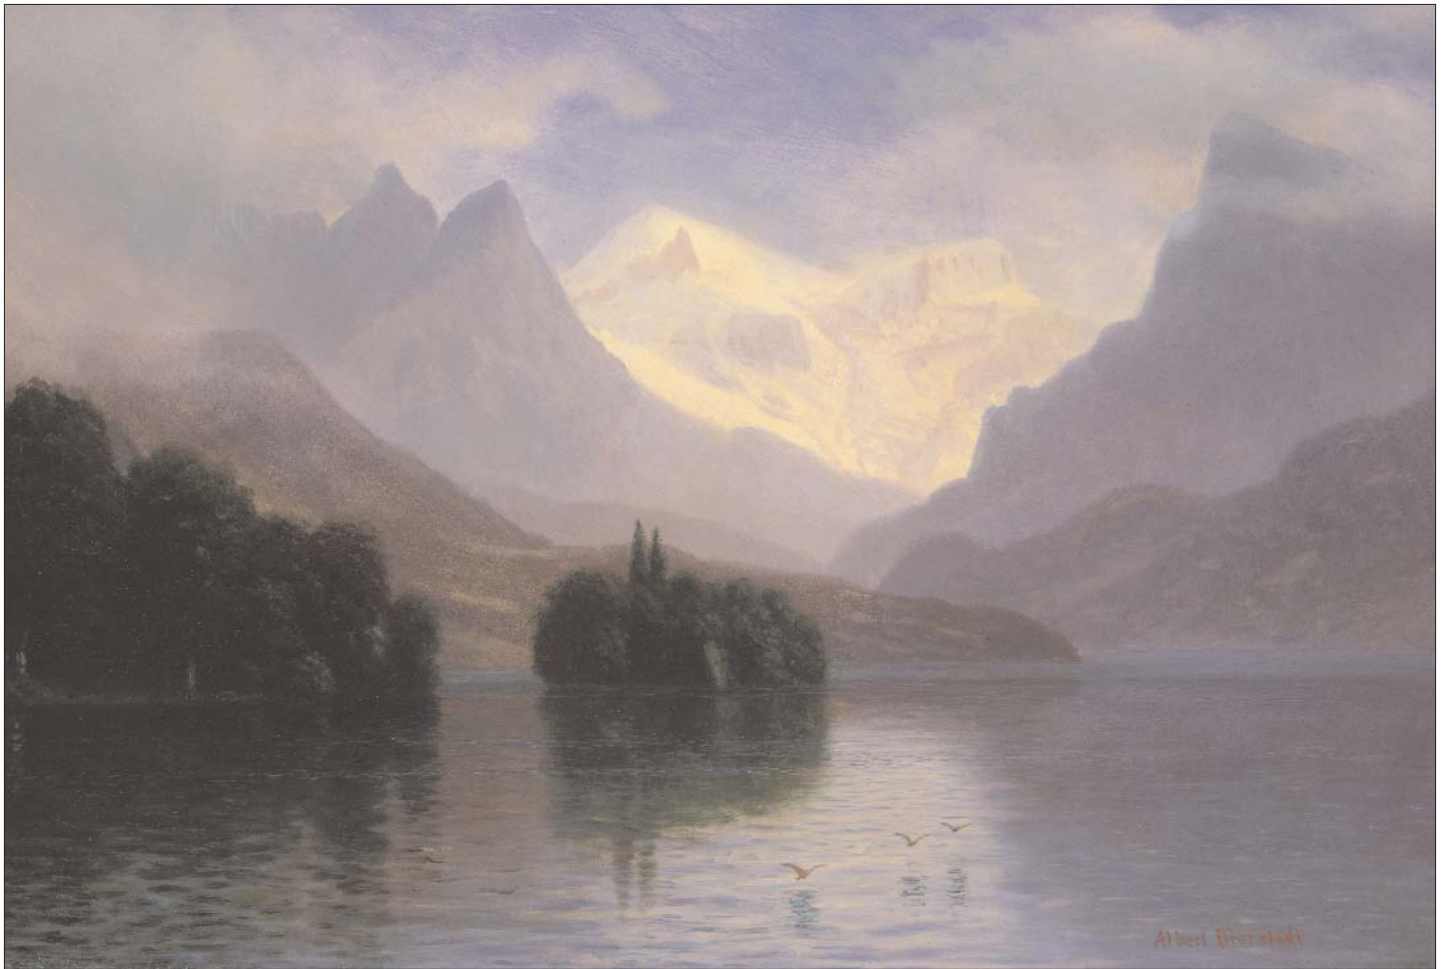

- ◆ Ultrashort Stays and the Need for a More Effective Model of 21st Century Inpatient Care
- ◆ How Does Parity Affect Use, Costs, and Quality of Substance Abuse Care?
- ◆ A Five-Year Follow-Up Study Assessing Capitation's Impact: Colorado CMHCs and Medicaid
